# Supplementary material for: Serious Mental Illness and Risk of New HIV/AIDS Diagnoses: An Analysis of Medicaid Beneficiaries in Eight States
Source: Atypon-hosted journal article supplement (doi:10.1176/appi.ps.201100342), 2012-10-01
Supplement: 1032_ds001.pdf [file 1032_ds001.pdf]

**Figure 1: Adjusted<sup>a</sup> odds of receiving a new HIV/AIDS diagnosis in 2002-2004 among three groups of Medicaid beneficiaries with diagnoses in 2001 of serious mental illness or substance abuse, relative to beneficiaries with neither**

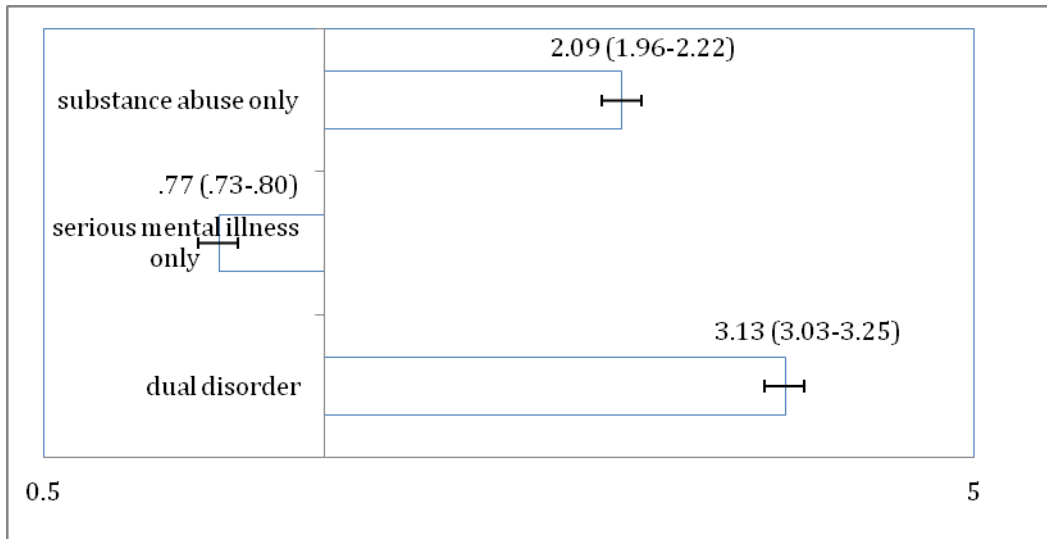

<sup>a</sup>Odds ratios are adjusted for gender, age, race/ethnicity, dual-eligibility versus Medicaid only, and presence in 2001 of sexually transmitted disease, anxiety disorder, and depression other than major depressive disorder.

**Figure 2: Adjusted<sup>a</sup> odds of receiving a new HIV/AIDS diagnosis in 2002-2004 among seven groups of Medicaid beneficiaries with diagnoses in 2001 of serious mental illness or substance abuse, relative to beneficiaries with neither**

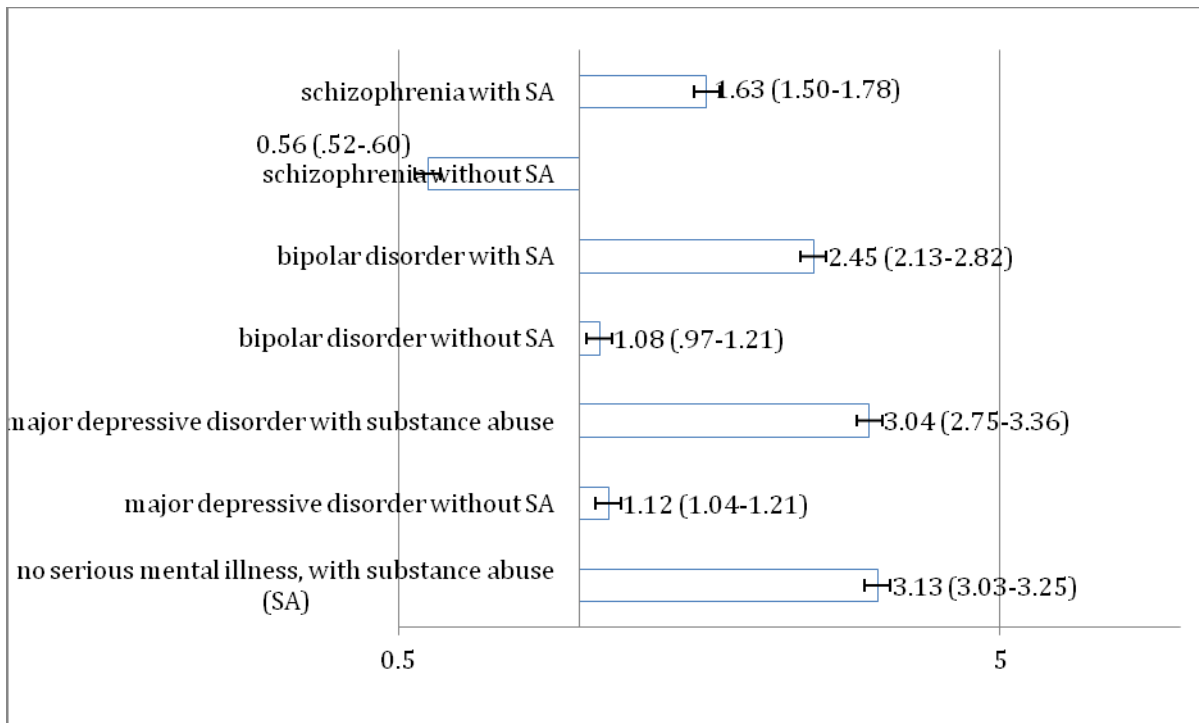

<sup>a</sup>Odds ratios are adjusted for gender, age, race/ethnicity, dual-eligibility versus Medicaid only, and presence in 2001 of sexually transmitted disease, anxiety disorder, and depression other than major depressive disorder.
